# Supplementary material for: Sleep-related hypermotor epilepsy: Long-term outcome in a large cohort
Source: PubMed Central journal article supplement (PMC5200852; doi:10.1212/wnl.0000000000003459), 2017-01-03

**Figure e-1: Panel 1: clinical features and diagnostic criteria of SHE<sup>1</sup>**

## **Panel 1: clinical features and diagnostic criteria of SHE<sup>1</sup>**

### **Clinical features**

Sleep-related Hypermotor seizures (HS):

- hyperkinetic features  
possible asymmetric tonic/dystonic posturing
- brief duration (<2 minutes)
- abrupt onset and offset
- stereotyped motor pattern

Occurrence of seizures in wakefulness, comorbidities with ID/neuropsychiatric disorders, absence of interictal and ictal scalp EEG abnormalities, extra-frontal origin of seizures do NOT represent exclusion criteria

### **Diagnostic criteria**

#### **Witnessed (possible) SHE**

Clinical history of events consistent with HS, provided by an eye witness

#### **Video-documented (clinical) SHE**

Reliable audio-video documentation of HS:

- at least 1 event (preferably 2)
- clear visualization of the entire event
- event confirmed to be typical by witness

#### **Video-EEG documented (confirmed) SHE**

Video-EEG documentation of HS arising from sleep associated with:

- clear-cut epileptic discharge and/or
- interictal epileptiform abnormalities

Technical requirements:

- daytime sleep recording after sleep deprivation/full night sleep recording
- at least 19 EEG channels (10-20 International System)
- ECG, oculogram, chin EMG

**Figure e-2: Outcome flow-chart.**

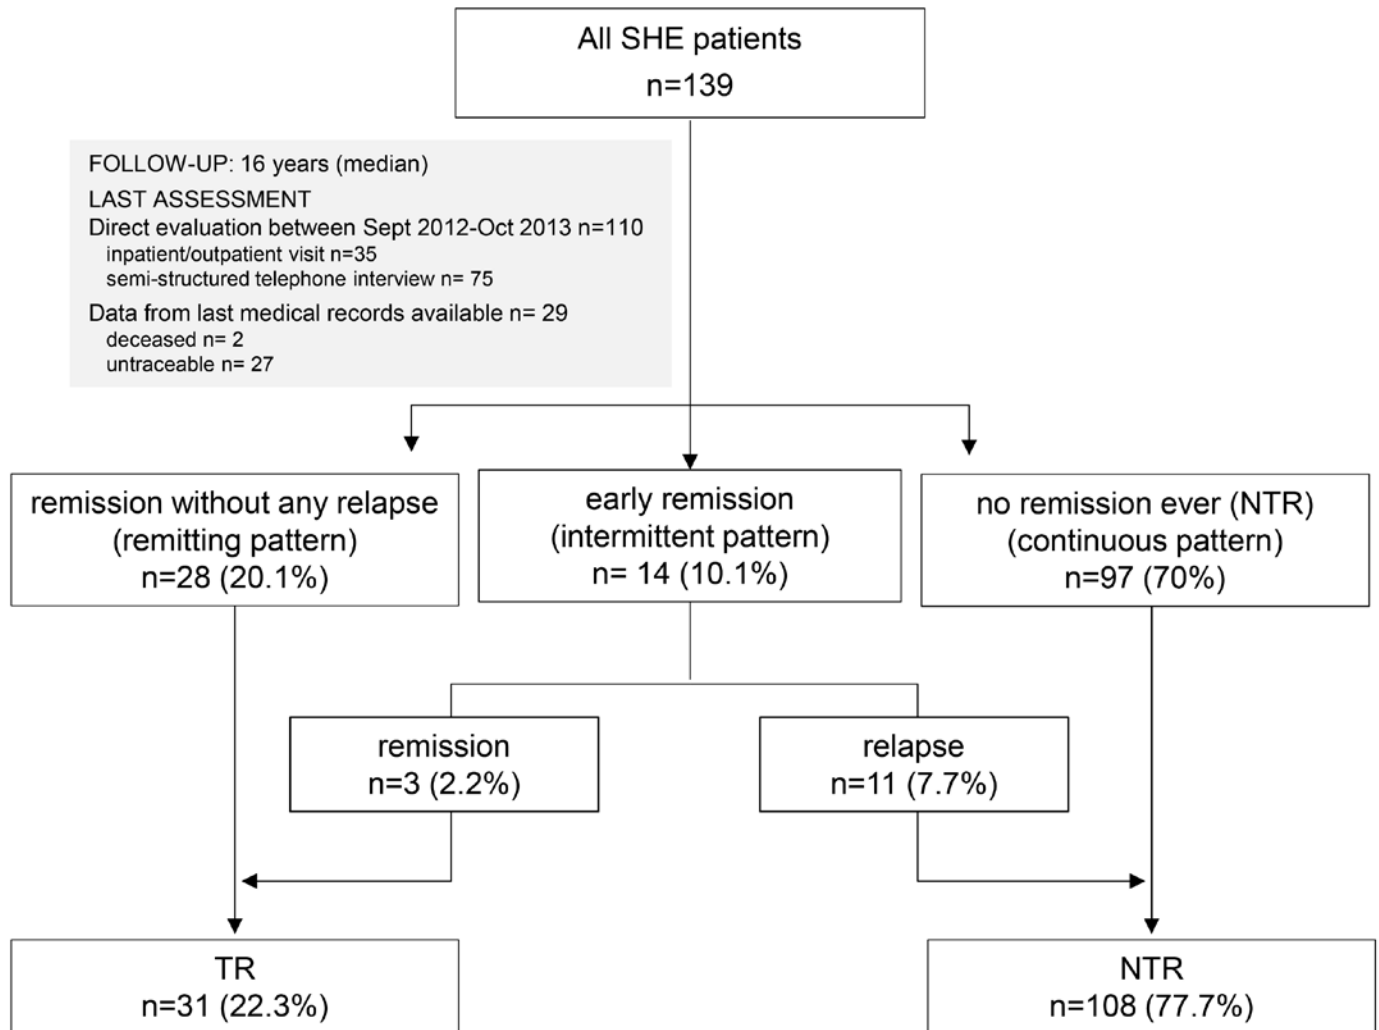

Supplement: supp_WNL.0000000000003459_e-figures.pdf [file supp_WNL.0000000000003459_e-figures.pdf]
